# Supplementary material for: The Heidelberg Milestones Communication Approach (MCA) for patients with prognosis <12 months: protocol for a mixed-methods study including a randomized controlled trial
Source: Trials. 2018 Aug 14;19:438. doi: 10.1186/s13063-018-2814-1 (PMC6092809; doi:10.1186/s13063-018-2814-1)
Supplement: Supplementary file 3 — Confirmation Approval. (PDF 717 kb) [file 13063_2018_2814_MOESM3_ESM.pdf]

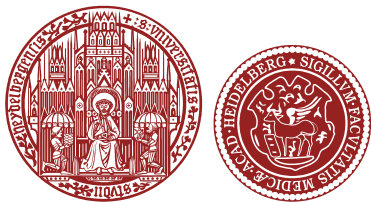

## Medizinische Fakultät Heidelberg

Ethikkommission der Med. Fak. HD | Alte Glockengießerei 11/1 | D-69115 Heidelberg

Herrn Matthias Villalobos  
Internistische Onkologie Thorakaler Tumoren  
Thoraxklinik  
Universität Heidelberg  
Röntgenstrasse 1  
69126 Heidelberg

23.03.2018  
ts-cd

### Confirmation Approval

**Unser Zeichen:** 561/2017 (Bitte stets angeben)

**Titel:** Evaluation des Heidelberger Meilenstein-Kommunikationskonzeptes (HeiMeKOM) Phasen 2 und 3

**Eingereichte** Ersteinreichung vom 12.10.2017:

**Unterlagen:**

Anschreiben vom 12.10.2017

Zusammenfassung Version 1.00 vom 12.10.2017

Checkliste Sonstige Studien

Formular für Erstantrag

Informationsschreiben (für Untersuchungen im Klinikteam zum Forschungsprojekt) Version 1.0

Informationsschreiben (für qualitative Untersuchungen mit Ärzten und Pflegekräften zum Forschungsprojekt) Version 1.0

Informationsschreiben (für Patienten und Angehörige zu Gesprächen) Version 1.0

Informationsschreiben (für Patienten/Angehörige zum Forschungsprojekt) Version 1.0

Informationsschreiben (zur Evaluation der Schulung im Forschungsprojekt) Version 1.0

Informationsschreiben (für Patienten zur Videoaufzeichnung des Gesprächs mit Arzt und Pflege) Version 1.0

Einwilligungserklärung (für Untersuchungen im Klinikteam) Version 1.0

Einwilligungserklärung (für qualitative Untersuchungen mit Ärzten und Pflegekräften) Version 1.0

Einwilligungserklärung (für Patienten und Angehörigen zu Gesprächen) Version 1.0

Einwilligungserklärung (für Patienten/Angehörige) Version 1.0

Einwilligungserklärung (zur Evaluation der Schulung) Version 1.0

Einwilligungserklärung (für Patienten zur Videoaufzeichnung des Gesprächs mit Arzt und Pflege) Version 1.0

Studienprotokoll Version 1.0 vom 12.10.2017

CV Matthias Villalobos vom 12.10.2017

Inhaltliche Nachreichung vom 23.11.2017:

Ihr Anschreiben vom 23.11.2017

Informationsschreiben (für Untersuchungen im Klinikteam zum Forschungsprojekt) Version 1.1 (mit Markierung der Änderungen)

Informationsschreiben (für qualitative Untersuchungen mit Ärzten und Pflegekräften zum Forschungsprojekt) Version 1.1 (mit Markierung der Änderungen)

Informationsschreiben (für Patienten zu Gesprächen) Version 1.1 (mit Markierung der Änderungen)

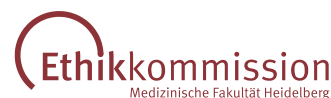

Alte Glockengießerei 11/1  
D-69115 Heidelberg

+49 (0) 6221 / 33 8 22 0 (Empfang)  
+49 (0) 6221 / 33 8 22 22  
ethikkommission-1@med.uni-heidelberg.de

www.medizinische-fakultaet-hd.uni-heidelberg.de/  
ethikkommission

#### Vorsitz:

Prof. Dr. med. Thomas Strowitzki

#### Stellv. Vorsitz:

Prof. Dr. med. Johannes Schröder  
Prof. Dr. med. Klaus Herfarth

#### Geschäftsleitung:

Dr. med. Verena Pfeilschifter

#### Sonstige Studien:

Gero Blim, LL.M.

+49 6221 3382218

+49 6221 3382222

Gero.Blim@med.uni-heidelberg.de

Christian Deisenroth, M.A.

+49 6221 3382215

+49 6221 3382222

Christian.Deisenroth@med.uni-heidelberg.de

Dr. rer. nat. Sabine Vogel

+49 6221 3382219

+49 6221 3382222

Sabine.Vogel@med.uni-heidelberg.de

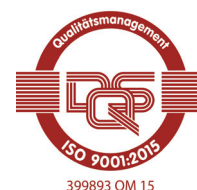

#### Bankverbindung:

Baden-Württembergische Bank Stuttgart  
Konto-Nr.: 7421 500 429  
BLZ: 600 501 01  
SWIFT/BIC Code: SOLADEST  
IBAN-Nr.: DE 64600501017421500429

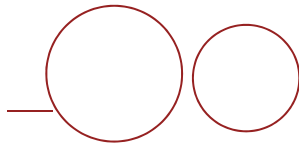

Informationsschreiben (für Patienten zum Forschungsprojekt) Version 1.1 (mit Markierung der Änderungen)  
Informationsschreiben (für Mitarbeiter zur Evaluation der Schulung im Forschungsprojekt) Version 1.1 (mit Markierung der Änderungen)  
Informationsschreiben (für Patienten zur Videoaufzeichnung des Gesprächs mit Arzt und Pflege) Version 1.1 (mit Markierung der Änderungen)  
Informationsschreiben für Angehörige zu Gesprächen Version 1.0 (neues Dokument)  
Informationsschreiben für Angehörige zur Videoaufzeichnung mit Arzt und Pflege Version 1.0 (neues Dokument)  
Einwilligungserklärung (für Untersuchungen im Klinikteam) Version 1.1 (mit Markierung der Änderungen)  
Einwilligungserklärung (für qualitative Untersuchungen mit Ärzten und Pflegekräften) Version 1.1 (mit Markierung der Änderungen)  
Einwilligungserklärung (für Patienten und Angehörigen zu Gesprächen) Version 1.1 (mit Markierung der Änderungen)  
Einwilligungserklärung (für Patienten) Version 1.1 (mit Markierung der Änderungen)  
Einwilligungserklärung (für Mitarbeiter zur Evaluation der Schulung) Version 1.1 (mit Markierung der Änderungen)  
Einwilligungserklärung (für Patienten zur Videoaufzeichnung des Gesprächs mit Arzt und Pflege) Version 1.1 (mit Markierung der Änderungen)  
Einwilligungserklärung für Angehörige zu Gesprächen Version 1.0 (neues Dokument)  
Einwilligungserklärung für Angehörige zur Videoaufzeichnung des Gesprächs mit Arzt und Pflege Version 1.0 (neues Dokument)  
Studienprotokoll Version 1.1 vom 23.11.2017 (mit Markierung der Änderungen)  
Gesundheitsfragebogen für Patienten (PHQ-4)  
Fragebogen NCCN Distress-Thermometer  
Fragebogen FACT-G (Fassung 4)  
Fragebogen FACT-L (Fassung 4)  
Fragebogen zum Unterstützungsbedarf von Angehörigen  
Krebskranker SCNS P&C-G  
Fragebogen SEIQoL-Q  
The UWE (University of the West of England) Interprofessional Questionnaire

Dear Mr. Villalobos

we hereby confirm that the above mentioned research project has been reviewed and approved by the Ethics Committee of the Medical Faculty of Heidelberg University. The approval of the Ethics Committee (Berufsrechtliche Beratung), dated to November 29 2017, has been sent to you on November 29 2017.

Kind regards

i.V.

Prof. Dr. med. Thomas Strowitzki  
Vorsitzender
